# Supplementary material for: Novel Lipophilic Lanthanide Bis-Phthalocyanines Functionalized by Pentadecylphenoxy Groups: Synthesis, Characterization and UV-Photostability
Source: MDPI journal article supplement (doi:10.3390/molecules170910738), 2012-09-07
Supplement: s1 [file s1]

## Supplementary Information

# Novel Lipophilic Lanthanide Bis-Phthalocyanines Functionalized by Pentadecylphenoxy Groups: Synthesis, Characterization and UV-Photostability

Rudolf Slota <sup>1,\*</sup>, Gabriela Dyrda <sup>1</sup>, Maria Hofer <sup>1</sup>, Giuseppe Mele <sup>2</sup>, Ermelinda Bloise <sup>2</sup> and Roberta del Sole <sup>2</sup>

<sup>1</sup> Faculty of Chemistry, Opole University, ul. Oleska 48, 45-052 Opole, Poland

<sup>2</sup> Department of Engineering for Innovation, University of Salento, Via Arnesano, 73100 Lecce, Italy

\* Author to whom correspondence should be addressed; E-Mail: rslota@uni.opole.pl;  
Tel.: +48-77-452-7131; Fax: +48-77-452-7101.

### 1. Infrared Spectra

Basically, the spectra of all studied LnPc<sub>2</sub>-R<sub>8</sub> compounds, measured in the infrared range 400–4000 cm<sup>-1</sup>, display a similar general pattern as that of the europium complex shown below.

**Figure S1.** Effect of pentadecylphenoxy-substitution in EuPc<sub>2</sub> displayed in the FTIR spectra (note the x-axis has been broken between 1700 and 2700 cm<sup>-1</sup> for brevity).

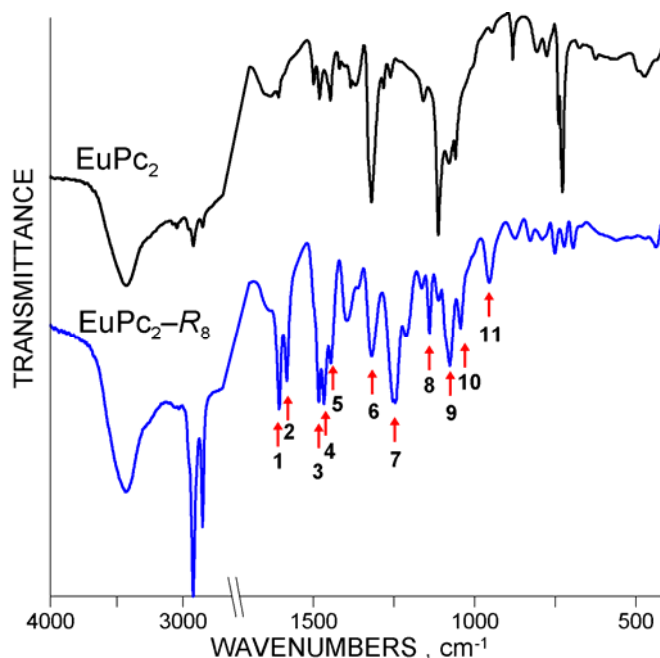

**Table S1.** Vibration frequencies ( $\text{cm}^{-1}$ ) registered in the FTIR spectra of  $\text{LnPc}_2\text{-R}_8$  corresponding to the numbers assigned to the chosen bands in Figure S1.

|    | Wavenumbers, $\text{cm}^{-1}$ |      |      |      |      |      |      |      |      |      |     |
|----|-------------------------------|------|------|------|------|------|------|------|------|------|-----|
|    | 1                             | 2    | 3    | 4    | 5    | 6    | 7    | 8    | 9    | 10   | 11  |
| Pr | 1606                          | 1583 | 1483 | 1467 | 1445 | 1322 | 1247 | 1142 | 1078 | 1044 | 962 |
| Nd | 1606                          | 1583 | 1480 | 1467 | 1446 | 1323 | 1253 | 1141 | 1079 | 1043 | 957 |
| Eu | 1606                          | 1582 | 1483 | 1467 | 1446 | 1320 | 1247 | 1140 | 1077 | 1044 | 955 |
| Gd | 1605                          | 1582 | 1484 | 1466 | 1445 | 1320 | 1246 | 1141 | 1077 | 1044 | 957 |
| Tb | 1605                          | 1582 | 1483 | 1467 | 1445 | 1322 | 1246 | 1142 | 1078 | 1044 | 960 |
| Dy | 1605                          | 1582 | 1483 | 1466 | 1444 | 1324 | 1246 | 1141 | 1079 | 1044 | 960 |
| Ho | 1605                          | 1583 | 1484 | 1467 | 1446 | 1324 | 1247 | 1142 | 1078 | 1045 | 960 |
| Er | 1605                          | 1583 | 1483 | 1467 | 1445 | 1325 | 1246 | 1142 | 1078 | 1045 | 962 |
| Tm | 1605                          | 1583 | 1483 | 1467 | 1445 | 1325 | 1247 | 1143 | 1080 | 1047 | 963 |
| Yb | 1605                          | 1583 | 1483 | 1467 | 1445 | 1326 | 1247 | 1143 | 1080 | 1048 | 963 |
| Lu | 1606                          | 1583 | 1484 | 1467 | 1446 | 1324 | 1247 | 1141 | 1080 | 1049 | 959 |

The IR spectra represent a very complex layout of absorption bands due to diverse coupling effects produced by the oscillating bonding system of the both phthalocyanine macrocycles. Distinct effect of the peripheral substitution is particularly pronounced in the following ranges: 2850–3000, 1582 (peak No. 2), 1445–1483 (No. 3–5), and 1247–1324  $\text{cm}^{-1}$  (No. 6,7), Figure S1. Incidentally, these bands directly confirm the presence of pentadecylphenoxy-groups attached to the phthalocyanine moiety.

Unlike in the UV-Vis spectra, no general trend related to the individual lanthanide metals has been found (see Table S1). Characteristic metal-sensitive stretching vibrations of the coupled  $\pi$ -electronic C-N bonding system for most of mono-metallophthalocyanines are observed at about 1050–1090  $\text{cm}^{-1}$ . For non-substituted  $\text{LnPc}_2$ 's this range lies between 1060 and 1080  $\text{cm}^{-1}$  showing insignificant susceptibility to the Ln metal. This frequency range corresponds to 1043–1080  $\text{cm}^{-1}$  (No. 9,10) in  $\text{LnPc}_2\text{-R}_8$ . Interestingly, the small shift (17  $\text{cm}^{-1}$ ) of the lower frequency value resembles somewhat the shift in UV-Vis spectra reported in Figure 6 (main text).

## 2. Fluorescence Emission Spectra

The novel  $\text{LnPc}_2\text{-R}_8$  complexes and  $\text{H}_2\text{Pc-R}_4$  excited by UV radiation show visible photonic emission both in the blue and red range of the visible spectrum. Under constant illumination performed during the photostability tests ( $\lambda = 352 \text{ nm}$ ) the  $\text{LnPc}_2\text{-R}_8$ 's evidently displayed some pale-blue emission whereas for  $\text{H}_2\text{Pc-R}_4$  it was a typical and distinctly red fluorescence, both of which could be observed. Diverse types of emission spectra registered for the studied compounds in DMF (and in  $\text{CH}_2\text{Cl}_2$  for the  $\text{H}_2\text{Pc}$  derivative) have been shown in Figure S2 and the  $\lambda$  values related to the appropriate bands are reported in Table S2. Complexes of Er and Tm were not investigated.

**Figure S2.** Fluorescence emission spectra-types representative for LnPc<sub>2</sub>-R<sub>8</sub> (in DMF) and H<sub>2</sub>Pc-R<sub>4</sub> (in dichloromethane). Excitation ( $\lambda_{\text{exc}}$ ) and emission ( $\lambda_1$ ,  $\lambda_2$ ) wavelength values have been shown in Table S2.

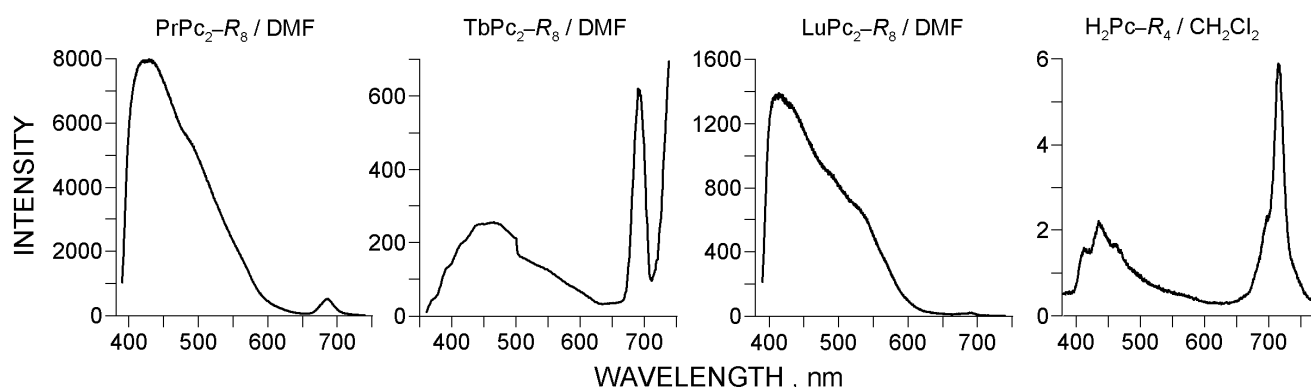

**Table S2.** Emission wavelength values determined for LnPc<sub>2</sub>-R<sub>8</sub> (in DMF) and H<sub>2</sub>Pc-R<sub>4</sub> (in dichloromethane); *a*—no red emission observed; <sup>s</sup> strong, <sup>w</sup> weak, <sup>vw</sup> very weak.

|                        | Pr               | Nd               | Eu               | Gd               | Tb               | Dy               | Ho               | Yb               | Lu                | H <sub>2</sub> Pc |
|------------------------|------------------|------------------|------------------|------------------|------------------|------------------|------------------|------------------|-------------------|-------------------|
| $\lambda_{\text{exc}}$ | 342              | 342              | 327              | 334              | 341              | 344              | 343              | 341              | 342               | 342               |
| $\lambda_1$            | 423 <sup>s</sup> | 456 <sup>s</sup> | 457 <sup>w</sup> | 450 <sup>s</sup> | 456 <sup>w</sup> | 554 <sup>w</sup> | 435 <sup>s</sup> | 407 <sup>w</sup> | 410 <sup>s</sup>  | 440 <sup>w</sup>  |
| $\lambda_2$            | 694 <sup>w</sup> | 685 <sup>w</sup> | 690 <sup>s</sup> | 684 <sup>w</sup> | 690 <sup>s</sup> | 692 <sup>s</sup> | <i>a</i>         | 693 <sup>s</sup> | 690 <sup>vw</sup> | 714 <sup>s</sup>  |

Although the particular systems reveal no general relation to the Ln atom, certain interesting observation emerges from the analyzed spectra. Namely, some of the compounds showing strong blue emission (for Pr, Nd and Gd) have been found the least resistant to UV illumination (in DMF) whereas those with intensive red fluorescence (e.g., for Tb, Dy and Yb) displayed significantly higher photostability (discussed in section 2.6). This however is not a rule and the registered emission spectra reflect the individual physicochemical nature of the LnPc<sub>2</sub>-R<sub>8</sub> complexes explored.

### 3. Elemental Analysis

The theoretically calculated chemical compositions (% mass) for the range of LnPc<sub>2</sub>-R<sub>8</sub> are as follows :

PrPc<sub>2</sub>-R<sub>8</sub> : C 77.6 H 8.7 N 6.2 O 3.6 Ln 3.9  
 LuPc<sub>2</sub>-R<sub>8</sub> : C 76.8 H 8.6 N 6.2 O 3.5 Ln 4.8

The spread of analytical values determined for C, H and N in the studied compounds was:

C 73.4–77.0 H 7.9–8.4 N 5.3–5.7

The best-consistent result was obtained for NdPc<sub>2</sub>-R<sub>8</sub> (and H<sub>2</sub>Pc-R<sub>4</sub>) :

NdPc<sub>2</sub>-R<sub>8</sub> : C 75.0 H 8.2 N 5.5  
 H<sub>2</sub>Pc-R<sub>4</sub> : calc. C 80.6 H 9.2 N 6.5 O 3.5  
 anal. C 78.5 H 8.8 N 6.2 ---

The analytical data acquired for the N content (depending on the LnPc<sub>2</sub>-R<sub>8</sub> compound) appeared to be more or less out of the expected (and to-be-accepted) range, due to unknown reason, so far. This issue will be explored in detail in a separate project.

Besides, it is worth to mention, that similar “problems” concerning the analytical results for the N content in metallophthalocyanines with octa-alkyl-substituted macrocycles may be found elsewhere, e.g., 9.6% less of the expected value shown for a Lu sandwich complex [13] or 11.4% more in the case of a Cu mono-complex (Piechocki et al., *J.Am.Chem.Soc.* **1982**, *104*, p.5246).

Nevertheless, the molecular identity of the novel LnPc<sub>2</sub>-R<sub>8</sub> complexes reported in this work has been sufficiently well confirmed by the MALDI-ToF and UV-Vis spectra.

#### 4. MALDI-ToF Results

**Table S4.** Mass spectra *m/z* results (MALDI-ToF) acquired for the novel bis-phthalocyanines LnPc<sub>2</sub>-R<sub>8</sub> (no data available for Tb, Er, Tm) and the metal-free base phthalocyanine, and the calculated molecular mass (M).

| Compound                           | M (calc.) | <i>m/z</i> (exp.) |
|------------------------------------|-----------|-------------------|
| H <sub>2</sub> Pc – R <sub>4</sub> | 1726      | 1722–1726         |
| PrPc <sub>2</sub> – R <sub>8</sub> | 3589      | 3583–3590         |
| NdPc <sub>2</sub> – R <sub>8</sub> | 3593      | 3585–3593         |
| EuPc <sub>2</sub> – R <sub>8</sub> | 3600      | 3592–3600         |
| GdPc <sub>2</sub> – R <sub>8</sub> | 3605      | 3599–3604         |
| DyPc <sub>2</sub> – R <sub>8</sub> | 3610      | 3604–3610         |
| HoPc <sub>2</sub> – R <sub>8</sub> | 3613      | 3607–3612         |
| YbPc <sub>2</sub> – R <sub>8</sub> | 3621      | 3617–3622         |
| LuPc <sub>2</sub> – R <sub>8</sub> | 3623      | 3618–3623         |
